# Supplementary material for: A Shadowing Problem in the Detection of Overlapping Communities: Lifting the Resolution Limit through a Cascading Procedure
Source: PLOS journal article supplement (doi:10.1371/journal.pone.0140133), 2015-10-13
Supplement: S2 (10.1371/journal.pone.0140133.s002) [file journal.pone.0140133.s002]

Table S2: Summary of the results presented in Fig. 5. and Fig. 6.

|                         | arXiv | Email | Gnutella | Internet | PGP  | Power | Protein | Words |
|-------------------------|-------|-------|----------|----------|------|-------|---------|-------|
| $\text{CPA}_s^a$        | 54.3  | 74.8  | 0        | 95.9     | 47.0 | 79.2  | 45.9    | 50.6  |
| $\text{CPA}_f^b$        | 7.7   | 65.8  | 0        | 88.0     | 6.7  | 5.5   | 18.1    | 22.0  |
| Iterations <sup>c</sup> | 3     | 2     | 1        | 4        | 2    | 2     | 2       | 2     |
| $\Delta T^d$            | 1.76  | 2.12  | 1.00     | 1.11     | 1.00 | 3.60  | 1.58    | 1.70  |
| $\text{GCE}_s^a$        | 26.9  | 64.9  | 99.7     | 40.1     | 32.4 | 92.4  | 51.7    | 54.5  |
| $\text{GCE}_f^b$        | 2.9   | 12.1  | 84.9     | 9.6      | 12.5 | 63.0  | 21.6    | 14.9  |
| Iterations <sup>c</sup> | 8     | 6     | 4        | 6        | 5    | 4     | 6       | 8     |
| $\Delta T^d$            | 1.76  | 1.08  | 8.69     | 1.11     | 1.56 | 8.08  | 2.69    | 3.02  |
| $\text{LCA}_s^a$        | 22.3  | 47.7  | 35.3     | 28.2     | 46.3 | 63.6  | 38.5    | 46.1  |
| $\text{LCA}_f^b$        | 2.3   | 1.3   | 18.7     | 2.7      | 4.5  | 4.4   | 6.2     | 2.6   |
| Iterations <sup>c</sup> | 7     | 5     | 2        | 5        | 6    | 3     | 3       | 5     |
| $\Delta T^d$            | 1.20  | 1.16  | 1.38     | 1.05     | 1.41 | 2.05  | 1.39    | 1.51  |

<sup>a</sup> Percentage of remaining assignable links for a *standard* use of the algorithm.

<sup>b</sup> Percentage of remaining assignable links after the cascading approach is applied.

<sup>c</sup> Number of applications of the cascading algorithm before the final state is reached.

<sup>d</sup> Relative increase in running time of the complete algorithm, averaged over 10 independent realizations, timed at the millisecond precision.
